# Supplementary material for: A supercapacitor based on longitudinal unzipping of multi-walled carbon nanotubes for high temperature application
Source: Royal Society of Chemistry journal article supplement (doi:10.1039/c5ra13136g), 2015-01-01
Supplement: c5ra13136g1.pdf [file c5ra13136g1.pdf]

Table S1: Comparison of some important properties of MWCNTs and UZ-MWCNTs

| <b>Properties</b>                                                          | <b>MWCNTs</b> | <b>UZ-MWCNTs</b> |
|----------------------------------------------------------------------------|---------------|------------------|
| BET surface area ( $\text{m}^2\text{g}^{-1}$ )                             | 230           | 355              |
| Specific capacitance ( $SC_{cd}$ ) at 27 °C ( $\text{F g}^{-1}$ )          | 22.2          | 42.8             |
| Specific capacitance ( $SC_{cd}$ ) at 100 °C ( $\text{F g}^{-1}$ )         | 27.7          | 74.8             |
| Specific energy ( $E_{sp}$ ) of the supercapacitor ( $\text{kWhkg}^{-1}$ ) | 20.5          | 35.8             |
| Time constant ( $\tau_0$ ) of the supercapacitor at 27 °C (s)              | 1.55          | 26,1             |
| Time constant ( $\tau_0$ ) of the supercapacitor at 100 °C (s)             | 0.68          | 72.2             |
